## Body mass index and efficacy and safety of ticagrelor versus prasugrel in patients with acute coronary syndromes

S. Lahu<sup>1</sup>, M. Behnes<sup>2</sup>, G. Ndrepepa<sup>1</sup>, F.J. Neumann<sup>3</sup>, D. Sibbing<sup>4</sup>, I. Bernlochner<sup>5</sup>, M. Menichelli<sup>6</sup>, K. Mayer<sup>1</sup>, G. Richardt<sup>7</sup>, D.J. Angiolillo<sup>8</sup>, K.L. Laugwitz<sup>5</sup>, H. Schunkert<sup>1</sup>, S. Schuepke<sup>1</sup>, A. Kastrati<sup>1</sup>, I. Akin<sup>2</sup>

<sup>1</sup>German Heart Centre Munich, Munich, Germany; <sup>2</sup>University Medical Centre of Mannheim, First Department of Medicine, Mannheim, Germany; <sup>3</sup>University Heart Center Freiburg-Bad Krozingen, Department of Cardiology and Angiology II, Bad Krozingen, Germany; <sup>4</sup>Ludwig Maximilians University Hospital, Munich, Germany; <sup>5</sup>Klinikum rechts der Isar, Medizinische Klinik und Poliklinik Innere Medizin I, Munich, Germany; <sup>6</sup>Hospital Fabrizio Spaziani, Cardiology, Frosinone, Italy; <sup>7</sup>Heart Center Bad Segeberg, Bad Segeberg, Germany; <sup>8</sup>University of Florida College of Medicine, Jacksonville, United States of America

**Funding Acknowledgement:** Type of funding sources: Public grant(s) – National budget only. Main funding source(s): German Center for Cardiovascular Research; Deutsches Herzzentrum München, Germany

**Background:** The efficacy and safety of ticagrelor versus prasugrel in patients with acute coronary syndromes (ACS) according to body mass index (BMI) remain unknown.

**Purpose:** To assess the efficacy and safety of ticagrelor versus prasugrel in patients with ACS according to BMI.

**Methods:** This post-hoc analysis of the ISAR-REACT 5 trial included 3987 patients with BMI data available. BMI was grouped in 3 categories: low (BMI < 25 kg/m<sup>2</sup>, n=1084), intermediate (BMI ≥ 25 to < 30 kg/m<sup>2</sup>, n=1890) and high (BMI ≥ 30 kg/m<sup>2</sup>, n=1013). The primary endpoint was the 12-month incidence of all-cause death, myocardial infarction, or stroke. The secondary endpoint was the 12-month incidence of Bleeding Academic Research Consortium (BARC) type 3 to 5 bleeding.

**Results:** There was no significant treatment arm-by-BMI interaction regarding the primary endpoint (Pint=0.578). However, the primary endpoint

occurred in 63 patients assigned to ticagrelor and 39 patients assigned to prasugrel in the low BMI group (11.7% vs. 7.5%; hazard ratio [HR]=1.62; 95% confidence interval [CI], 1.09–2.42; P=0.018), 78 patients assigned to ticagrelor and 58 patients assigned to prasugrel in the intermediate BMI group (8.3% vs. 6.2%; HR=1.36 [0.97–1.91]; P=0.076), and 43 patients assigned to ticagrelor and 37 patients assigned to prasugrel in the high BMI group (8.6% vs. 7.3%; HR=1.18 [0.76–1.84]; P=0.451). BARC type 3 to 5 bleeding events did not differ between ticagrelor and prasugrel in patients with low (6.5% vs. 6.6%), intermediate (5.6% vs. 5.0%), or high (4.4% vs. 2.8%) BMI.

**Conclusions:** BMI of patients with ACS did not impact significantly on the treatment effect of ticagrelor vs. prasugrel in terms of both efficacy and safety.

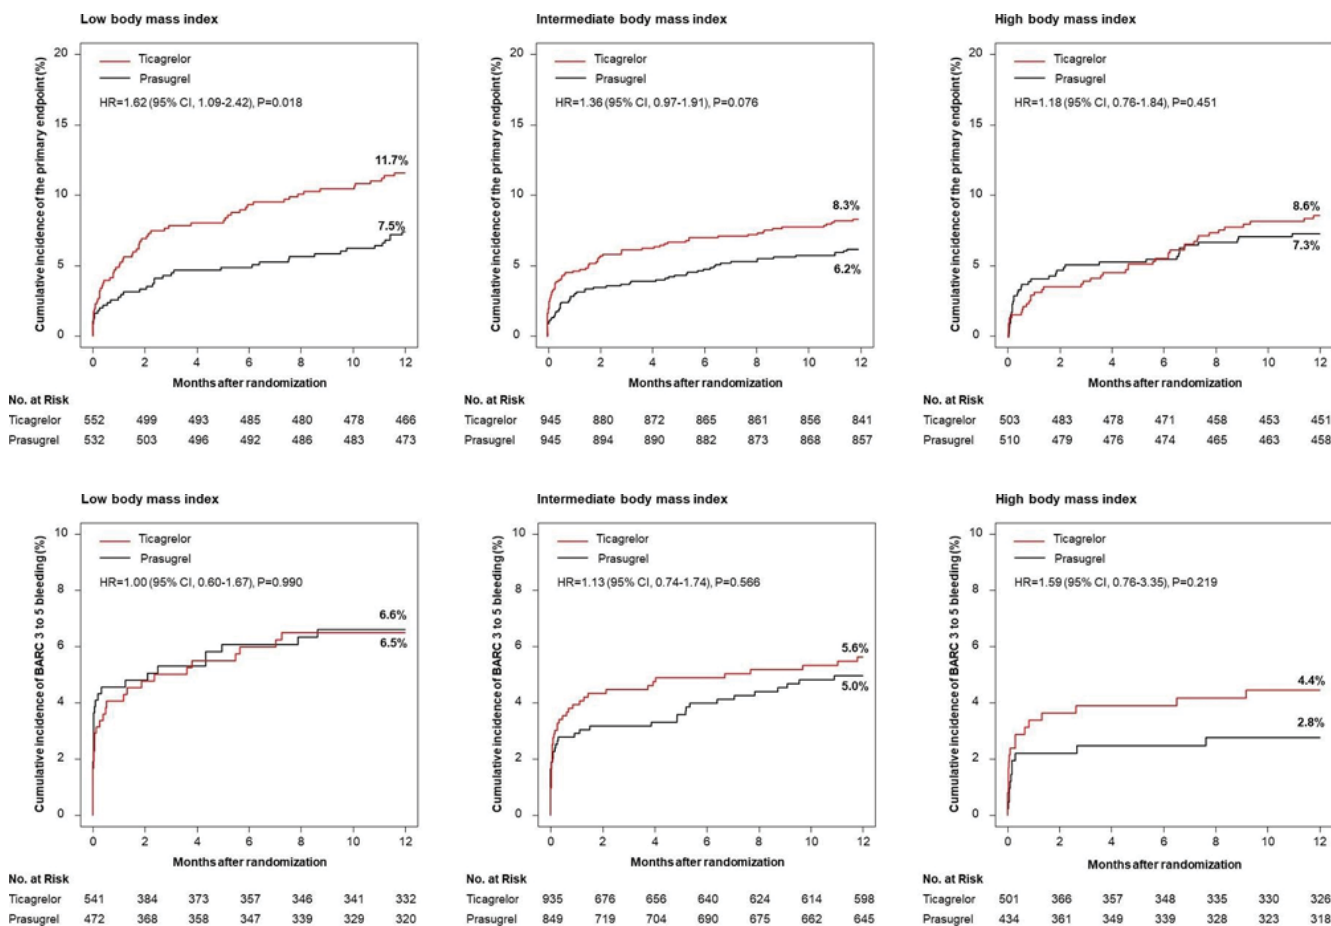

Source: http://academic.oup.com/eurheartj/article-pdf/42/Supplement_1/ehab724.1431/40589065/ehab724.1431.pdf
